# Supplementary material
Source: Springer Nature journal article supplement (https://www.springermedizin.de/resource/supplementary/13098_2013_302_MOESM4_ESM.pdf/9671012)

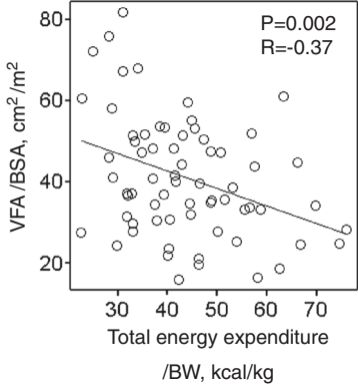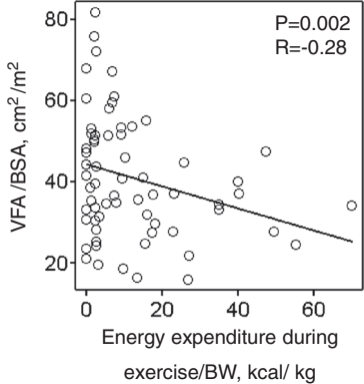

Supplement: MOESM4 [file 9671012]
